# Supplementary material for: Influence of ambient NO and NO 2 on the quantification of total peroxy nitrates (∑PNs) and total alkyl nitrates (∑ANs) by thermal dissociation cavity ring-down spectroscopy (TD-CRDS)
Source: Copernicus journal article supplement (doi:10.5194/egusphere-2024-3694), 2024-12-09
Supplement: Supplementary file 1 [file egusphere-2024-3694-supplement.pdf]

# Influence of ambient NO and NO<sub>2</sub> on the quantification of total peroxy nitrates ( $\Sigma$ PNs) and total alkyl nitrates ( $\Sigma$ ANs) by thermal dissociation cavity ring-down spectroscopy (TD-CRDS)

5 Laura Wüst<sup>1</sup>, Patrick Dewald<sup>1</sup>, Gunther N. T. E. Türk<sup>1</sup>, Jos Lelieveld<sup>1</sup> and John N. Crowley<sup>1</sup>

<sup>1</sup>Atmospheric Chemistry Department, Max Planck Institute for Chemistry, Mainz, 55128, Germany

Correspondence to: John N. Crowley (john.crowley@mpic.de)

## Supplement

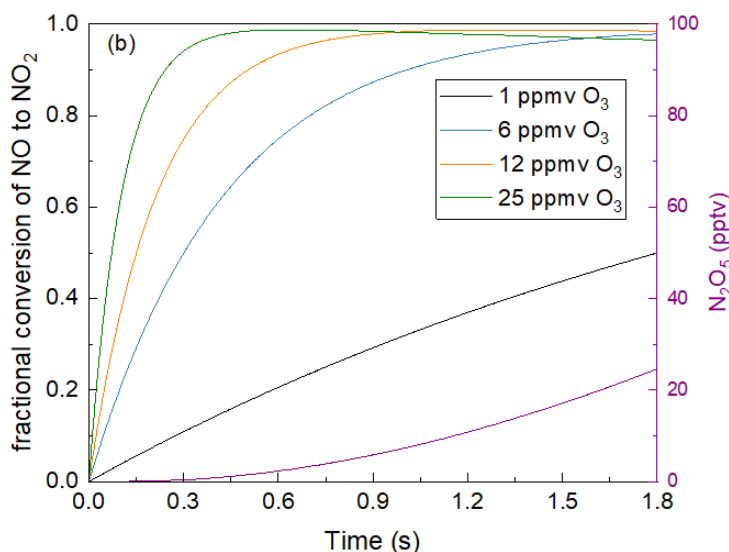

**Figure S1:** Numerical simulation of the conversion of NO to NO<sub>2</sub> in the presence of O<sub>3</sub>. The reaction scheme used is given below, the rate coefficients are those preferred by IUPAC (IUPAC, 2024).

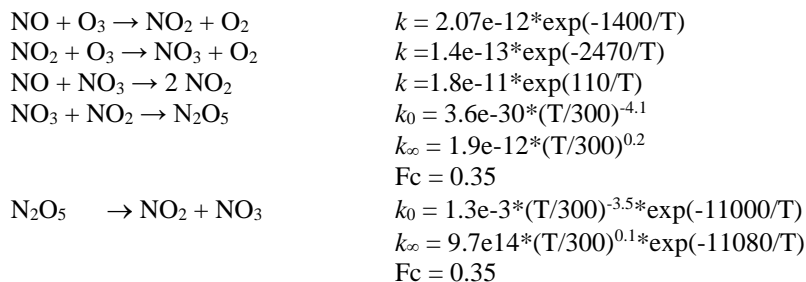

Rate coefficients for termolecular reactions were calculated using the parameters  $k_0$ ,  $k_\infty$  and Fc and the “Troe expression” as defined by IUPAC (IUPAC, 2024).

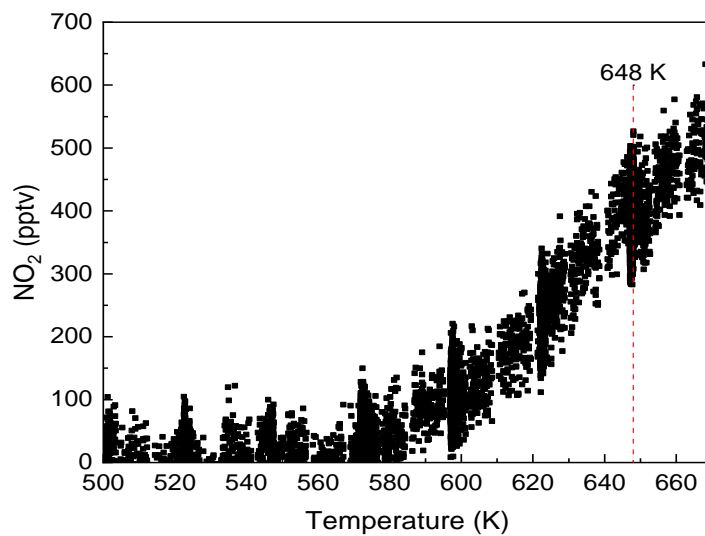

**Figure S2:** Effect of adding acetone (43 ppmv) to the TD-inlet associated with the  $\Sigma$ ANs cavity in the presence of 16 ppbv NO. The vertical red line indicates the normal operating temperature of the inlet at which  $\sim 400$  pptv NO<sub>2</sub> are observed.

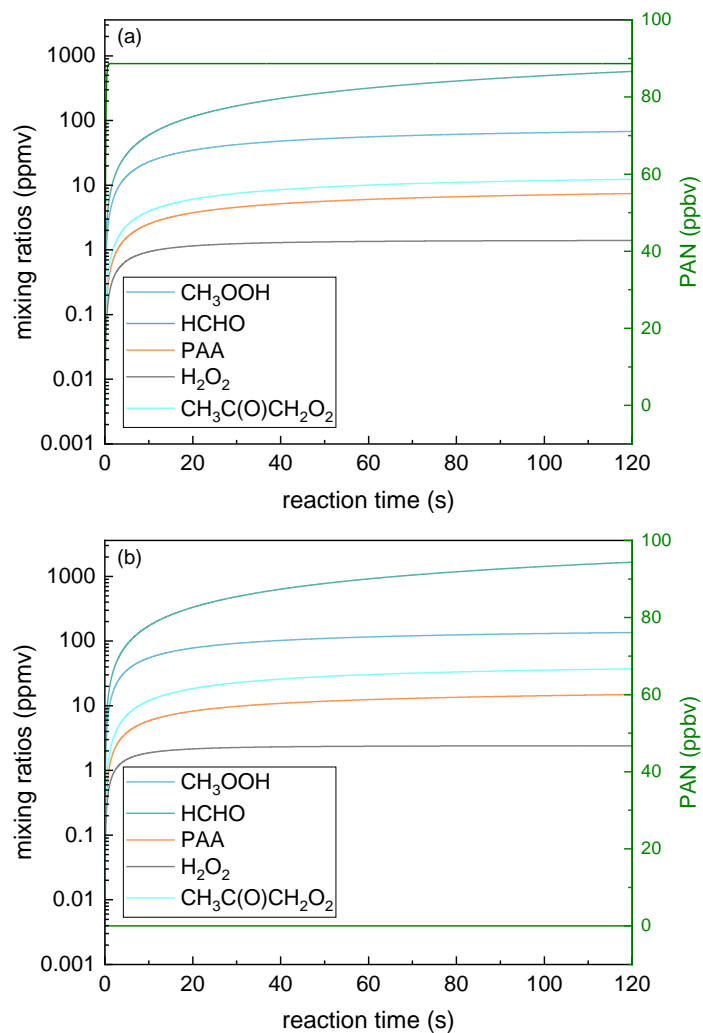

**Figure S3:** (a) Numerical simulation of the photochemical PAN reactor: 89 ppbv NO and 0.2 % acetone lead to the production of 88 ppbv PAN (right y-axis). (b) Same simulation but without NO (and therefore no PAN production). The reaction scheme used is listed in Table S1.

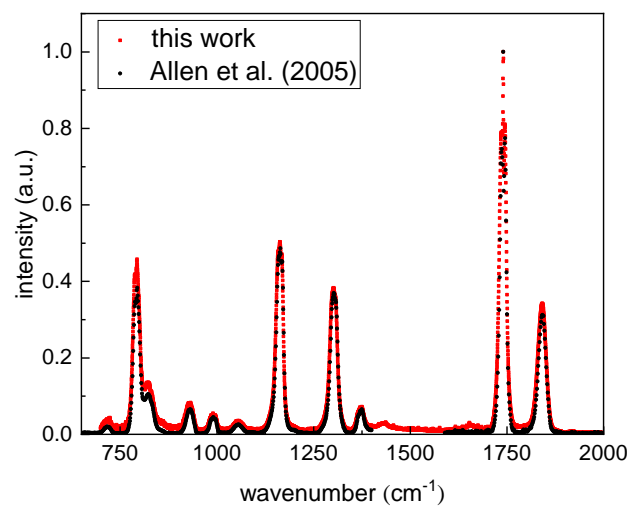

**Figure S4:** Intensity-normalised, averaged FTIR spectrum of PAN in air (red symbols) recorded at a resolution of 0.5 cm<sup>-1</sup>. Good agreement to values from Allen et al. (2005) (black symbols).

**Table S1:** Reactions considered in the numerical simulation of the PAN photochemical source.

| Reaction                                                                                                                                 | Rate coefficient                                                                                                              |
|------------------------------------------------------------------------------------------------------------------------------------------|-------------------------------------------------------------------------------------------------------------------------------|
| $\text{CH}_3\text{C}(\text{O})\text{CH}_3 + \text{O}_2 \rightarrow \text{CH}_3\text{C}(\text{O})\text{O}_2 + \text{CH}_3\text{O}_2$      | $^{a}2.94\text{e-}3$                                                                                                          |
| $\text{HO}_2 + \text{NO} \rightarrow \text{OH} + \text{NO}_2$                                                                            | $3.45\text{e-}12 * \exp(270/\text{T})$                                                                                        |
| $\text{OH} + \text{CO} \rightarrow \text{HO}_2$                                                                                          | $1.44\text{e-}13 * (1 + \text{M}/4.2\text{e}19)$                                                                              |
| $\text{OH} + \text{O}_3 \rightarrow \text{HO}_2$                                                                                         | $1.7\text{e-}12 * \exp(-940/\text{T})$                                                                                        |
| $\text{HO}_2 + \text{O}_3 \rightarrow \text{OH} + 2 \text{O}_2$                                                                          | $2.03\text{e-}16 * (\text{T}/300)^{4.57} * \exp(693/\text{T})$                                                                |
| $\text{OH} + \text{HCHO} \rightarrow \text{HO}_2$                                                                                        | $5.4\text{e-}12 * \exp(135/\text{T})$                                                                                         |
| $\text{CH}_3\text{O}_2 + \text{NO} (+ \text{O}_2) \rightarrow \text{NO}_2 + \text{HO}_2 + \text{HCHO}$                                   | $2.3\text{e-}12 * \exp(360/\text{T})$                                                                                         |
| $\text{CH}_3\text{O}_2 + \text{HO}_2 \rightarrow \text{CH}_3\text{OOH} + \text{O}_2$                                                     | $3.8\text{e-}13 * \exp(780/\text{T})$                                                                                         |
| $\text{CH}_3\text{OOH} + \text{OH} \rightarrow \text{CH}_3\text{O}_2 + \text{H}_2\text{O}$                                               | $5.3\text{e-}12 * \exp(190/\text{T}) * 0.6$                                                                                   |
| $\text{CH}_3\text{OOH} + \text{OH} (+ \text{O}_2) \rightarrow \text{OH} + \text{HO}_2 + \text{HCHO}$                                     | $5.3\text{e-}12 * \exp(190/\text{T}) * 0.4$                                                                                   |
| $\text{CH}_3\text{C}(\text{O})\text{O}_2 + \text{NO}_2 + \text{M} \rightarrow \text{PAN} + \text{M}$                                     | $k_0 = 2.7\text{e-}28 * (\text{T}/300)^{-7.1} \quad k_\infty = 1.2\text{E-}11 * (\text{T}/300)^{-0.9} \quad \text{Fc} = 0.3$  |
| $\text{PAN} \rightarrow \text{CH}_3\text{C}(\text{O})\text{O}_2 + \text{NO}_2$                                                           | $k_0 = 4.9\text{e-}3 * \exp(-12100/\text{T}) \quad k_\infty = 7.5\text{e}16 * \exp(-13830/\text{T}) \quad \text{Fc} = 0.3$    |
| $\text{CH}_3\text{C}(\text{O})\text{O}_2 + \text{HO}_2 \rightarrow \text{CH}_3\text{C}(\text{O})\text{OOH} + \text{O}_2$                 | $1.5\text{e-}12 * \exp(480/\text{T})$                                                                                         |
| $\text{CH}_3\text{C}(\text{O})\text{O}_2 + \text{HO}_2 \rightarrow \text{CH}_3\text{C}(\text{O})\text{OH} + \text{O}_3$                  | $4.4\text{e-}15 * \exp(1910/\text{T})$                                                                                        |
| $\text{CH}_3\text{C}(\text{O})\text{O}_2 + \text{HO}_2 \rightarrow \text{OH} + \text{CH}_3\text{O}_2 + \text{CO}_2$                      | $4.66\text{e-}12 * \exp(235/\text{T})$                                                                                        |
| $\text{CH}_3\text{C}(\text{O})\text{O}_2 + \text{NO} (+\text{O}_2) \rightarrow \text{NO}_2 + \text{CH}_3\text{O}_2 + \text{CO}_2$        | $7.5\text{e-}12 * \exp(290/\text{T})$                                                                                         |
| $\text{OH} + \text{PAA} \rightarrow \text{CH}_3\text{C}(\text{O})\text{O}_2 + \text{H}_2\text{O}$                                        | $3.0\text{e-}14$                                                                                                              |
| $\text{CH}_3\text{C}(\text{O})\text{O}_2 + \text{CH}_3\text{O}_2 \rightarrow \text{CH}_3\text{C}(\text{O})\text{OH} + \text{HCHO}$       | $2.0\text{e-}12 * \exp(500/\text{T}) * 0.1$                                                                                   |
| $\text{CH}_3\text{C}(\text{O})\text{O}_2 + \text{CH}_3\text{O}_2 \rightarrow \text{HO}_2 + \text{CH}_3\text{O}_2 + \text{HCHO}$          | $2.0\text{e-}12 * \exp(500/\text{T}) * 0.9$                                                                                   |
| $\text{CH}_3\text{O}_2 + \text{CH}_3\text{O}_2 \rightarrow 2 \text{HCHO} + 2 \text{HO}_2$                                                | $1.03\text{e-}13 * \exp(365/\text{T}) * 0.63$                                                                                 |
| $\text{CH}_3\text{O}_2 + \text{CH}_3\text{O}_2 \rightarrow \text{HCHO} + \text{CH}_3\text{OH} + \text{O}_2$                              | $1.03\text{e-}13 * \exp(365/\text{T}) * 0.37$                                                                                 |
| $\text{HO}_2 + \text{HCHO} \rightarrow \text{HOCH}_2\text{OO}$                                                                           | $9.7\text{e-}15 * \exp(625/\text{T})$                                                                                         |
| $\text{HOCH}_2\text{OO} + \text{NO} \rightarrow \text{NO}_2 + \text{HO}_2 + \text{HCOOH}$                                                | $5.6\text{e-}12$                                                                                                              |
| $\text{HOCH}_2\text{OO} + \text{HO}_2 \rightarrow \text{HOCH}_2\text{OOH} + \text{O}_2$                                                  | $0.5 * 1.2\text{e-}11$                                                                                                        |
| $\text{HOCH}_2\text{OO} + \text{HO}_2 \rightarrow \text{HCOOH} + \text{O}_2$                                                             | $0.3 * 1.2\text{e-}11$                                                                                                        |
| $\text{HOCH}_2\text{OO} + \text{HO}_2 \rightarrow \text{HO}_2 + \text{OH} + \text{HCHO}$                                                 | $0.2 * 1.2\text{e-}11$                                                                                                        |
| $\text{HOCH}_2\text{OOH} + \text{OH} \rightarrow \text{HOCH}_2\text{OO} + \text{H}_2\text{O}$                                            | $1\text{e-}11$                                                                                                                |
| $\text{CH}_3\text{C}(\text{O})\text{OH} + \text{OH} (+ \text{O}_2) \rightarrow \text{CH}_3\text{O}_2 + \text{CO}_2 + \text{H}_2\text{O}$ | $4.0\text{e-}14 * \exp(850/\text{T})$                                                                                         |
| $\text{CH}_3\text{OH} + \text{OH} (+\text{O}_2) \rightarrow \text{HCHO} + \text{HO}_2 + \text{H}_2\text{O}$                              | $2.85\text{e-}12 * \exp(-345/\text{T})$                                                                                       |
| $\text{CH}_3\text{C}(\text{O})\text{CH}_3 + \text{OH} \rightarrow \text{CH}_3\text{COCH}_2\text{O}_2 + \text{H}_2\text{O}$               | $8.8\text{e-}12 * \exp(-1320/\text{T}) + 1.7\text{e-}14 * \exp(423/\text{T})$                                                 |
| $\text{CH}_3\text{COCH}_2\text{O}_2 + \text{NO} \rightarrow \text{NO}_2 + \text{CH}_3\text{C}(\text{O})\text{O}_2 + \text{HCHO}$         | $8\text{e-}12$                                                                                                                |
| $\text{NO} + \text{O}_3 \rightarrow \text{NO}_2$                                                                                         | $3.0\text{e-}12 * \exp(-1500/\text{T})$                                                                                       |
| $\text{OH} + \text{NO}_2 \rightarrow \text{HNO}_3 + \text{NO}_2$                                                                         | $k_0 = 3.2\text{e-}30 * (\text{T}/300)^{-4.5} \quad k_\infty = 3.0\text{x} 10^{-11} \quad \text{Fc} = 0.41$                   |
| $\text{HO}_2 + \text{HO}_2 \rightarrow \text{H}_2\text{O}_2$                                                                             | $2\text{e-}12$                                                                                                                |
| $\text{H}_2\text{O}_2 + \text{OH} \rightarrow \text{HO}_2$                                                                               | $2.9\text{e-}12 * \exp(-160/\text{T})$                                                                                        |
| $\text{OH} + \text{NO} \rightarrow \text{HONO}$                                                                                          | $k_0 = 7.4\text{e-}31 * (\text{T}/300)^{-2.4} \quad k_\infty = 3.3\text{e-}11 * (\text{T}/300)^{-0.3} \quad \text{Fc} = 0.81$ |
| $\text{OH} + \text{HONO} \rightarrow \text{NO}_2$                                                                                        | $2.5\text{e-}12 * \exp(260/\text{T})$                                                                                         |

Notes: <sup>a</sup>Calculated from measured photolysis rate of O<sub>3</sub> combined with acetone and O<sub>3</sub> cross sections and quantum yields at 280 nm. M = molecular density in molecule cm<sup>-3</sup> and T is the temperature in K. Rate coefficients for termolecular reactions were calculated using the parameters *k*<sub>0</sub>, *k*<sub>∞</sub> and Fc and the “Troé expression” as defined by IUPAC (IUPAC, 2024).

## References

Allen, G., et al.: Improved mid-infrared cross-sections for peroxyacetyl nitrate (PAN) vapour, *Atmos. Chem. Phys.*, 5, 47-56, 2005.

IUPAC: IUPAC Task Group on Atmospheric Chemical Kinetic Data Evaluation, (Ammann, M., Cox, R.A., Crowley, J.N., Herrmann, H., Jenkin, M.E., McNeill, V.F., Mellouki, A., Rossi, M. J., Troé, J. and Wallington, T. J.). Last access Sept. 2024, <https://iupac.aeris-data.fr/>, 2024.
